# Supplementary material for: Isolation of compounds from the roots of Ambrosia artemisiifolia and their effects on human cancer cell lines
Source: publisher site journal article supplement (doi:10.1515/znc-2022-0239), 2023-04-08
Supplement: Supplementary file 1 [file j_znc-2022-0239_suppl_001.docx]

**SUPPLEMENTARY MATERIAL**

**Isolation of compounds from the roots of *Ambrosia artemisiifolia* and their effects on human cancer cell lines**

Elek Ferencz,1,2 Gabriella Spengler,3 István Zupkó,4 Martin Vollár,1 Zoltán Péter Zomborszki,1 Norbert Kúsz,1 Judit Hohmann,1,5 Balázs Kovács,1 Dezső Csupor,1,6,7 Eszter Laczkó-Zöld,8 Boglárka Csupor-Löffler1,6,*

1 Institute of Pharmacognosy, Faculty of Pharmacy, University of Szeged,
Eötvös u. 6, H-6720 Szeged, Hungary

2 Department of Physical Chemistry, George Emil Palade University of Medicine, Pharmacy, Science, and Technology of Targu Mures, Gh. Marinescu 38, RO-540139 Tîrgu Mureș, Romania

3 Department of Medical Microbiology, Albert Szent-Györgyi Health Center and Albert Szent-Györgyi Medical School, University of Szeged, Semmelweis u. 6, H-6725 Szeged, Hungary.

4 Institute of Pharmacodynamics and Biopharmacy, Faculty of Pharmacy, University of Szeged,
Eötvös u. 6, H-6720 Szeged, Hungary

5 ELKH-USZ Biologically Active Natural Products Research Group, University of Szeged,
Eötvös u. 6, H-6720 Szeged, Hungary

6 Institute for Translational Medicine, Medical School, University of Pécs,
Szigeti út 12, H-7624 Pécs, Hungary

7 Institute of Clinical Pharmacy, Faculty of Pharmacy, University of Szeged,
Szikra u. 8, H-6725 Szeged, Hungary

8 Department of Pharmacognosy, George Emil Palade University of Medicine, Pharmacy, Science,
and Technology of Targu Mures, Gh. Marinescu 38, RO-540139 Tîrgu Mureș, Romania

**Content**

**Fig. S1**. 1H NMR spectrum of compound **1.** ……………………………………………………………………….……..……3

**Fig. S2**. 13C JMOD spectrum of compound **1**. ……………………………………………………………..………..….……3

**Fig. S3**. 1H-1H COSY spectrum of compound **1**. ……………………………………………………………..………………4

**Fig. S4**. HSQC spectrum of compound **1**. ……………………………………………………………..……….…………4

**Fig. S5**. HMBC spectrum of compound **1**. ……………………………………………………………..…………………5

**Fig. S6**. 1H NMR spectrum of compound **2**. ……………………………………………………………..…………….………5

**Fig. S7**. 1H NMR spectrum of compound **3**. ……………………………………………………………..……………….……6

**Fig. S8**. 1H NMR spectrum of compound **4**. ……………………………………………………………..……………….……6

**Fig. S9**. 1H NMR spectrum of compound **5**. ……………………………………………………………..……………….……7

**Fig. S10**. 13C JMOD spectrum of compound **5**. ……………………………………………………………..……….….……7

**Fig. S11**. 1H-1H COSY spectrum of compound **5**. ……………………………………………………………..………………8

**Fig. S12**. HSQC spectrum of compound **5**. ……………………………………………………………..………………….……8

**Fig. S13**. HMBC spectrum of compound **5**. ……………………………………………………………..………………………9

**Fig. S14**. NOESY spectrum of compound **5**. ……………………………………………………………..………………..……9

**Fig. S15**. 1H NMR spectrum of compound **6**. ……………………………………………………………..…………….……10

**Fig. S16**. 13C JMOD spectrum of compound **6.** .……………………………………………………………..………….…. …10

**Fig. S17**. Mass spectrum (APCI) of compound **6**. ……………………………………………………………..………….……11

**Fig. S18.** Dose-effect curves of antiproliferative effects of compounds **3** and **4.** ………………………………12


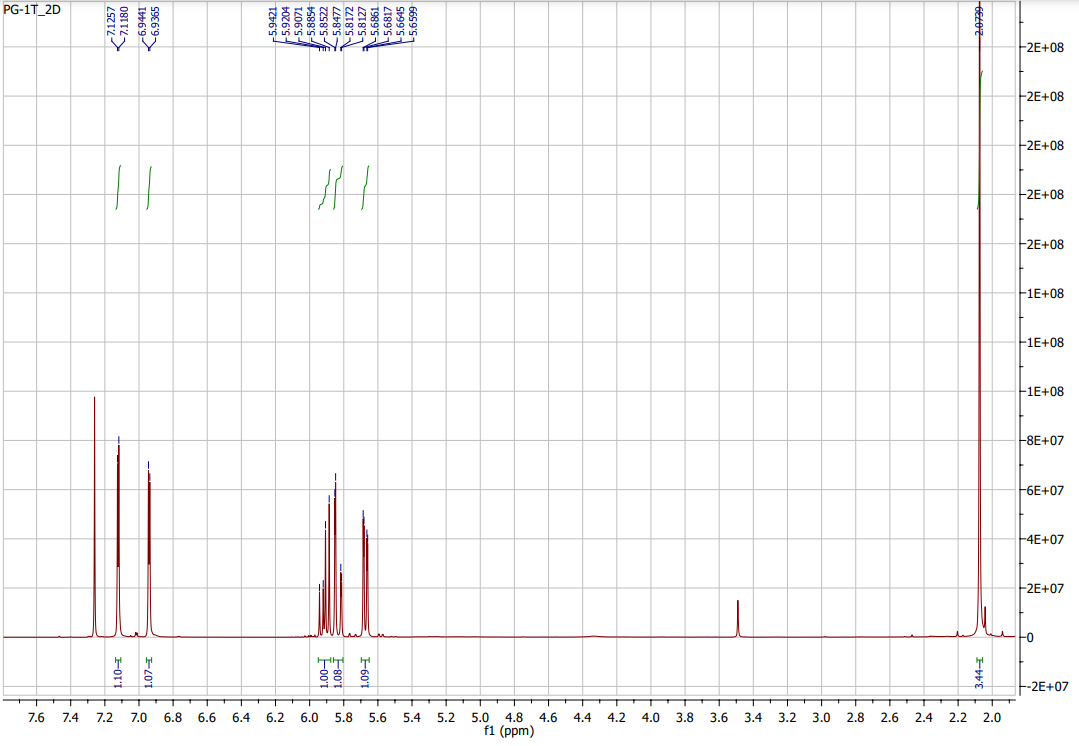


**Fig. S1**. 1H NMR spectrum of compound **1**.


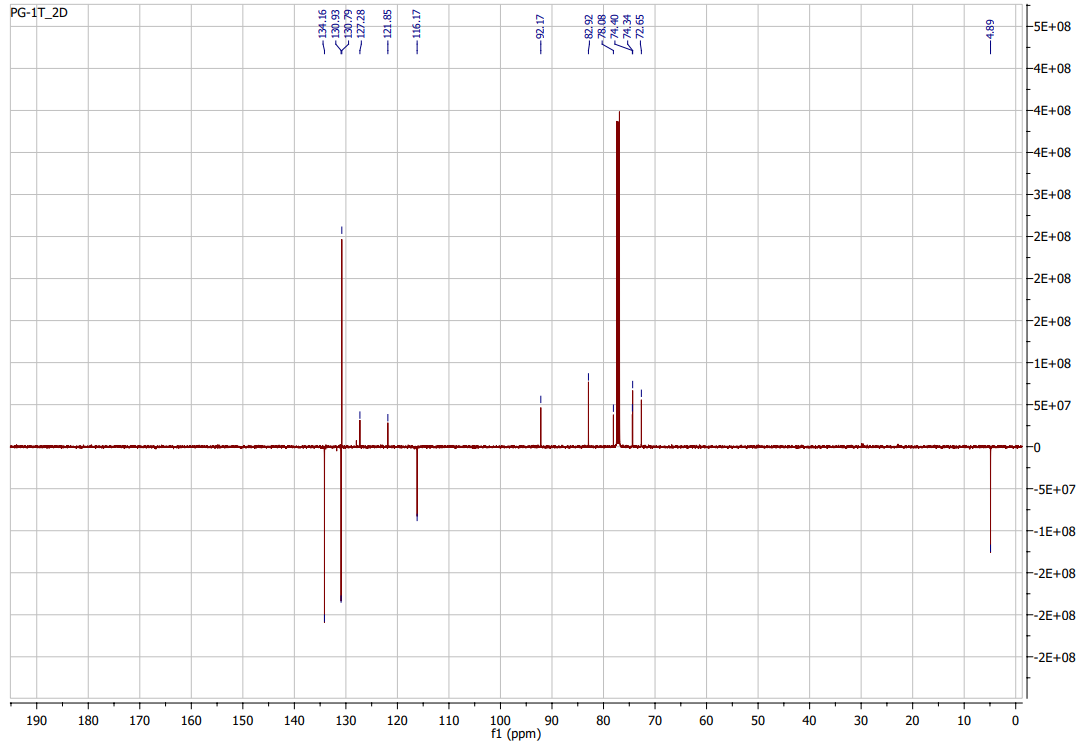


**Fig. S2**. 13C JMOD spectrum of compound **1**.


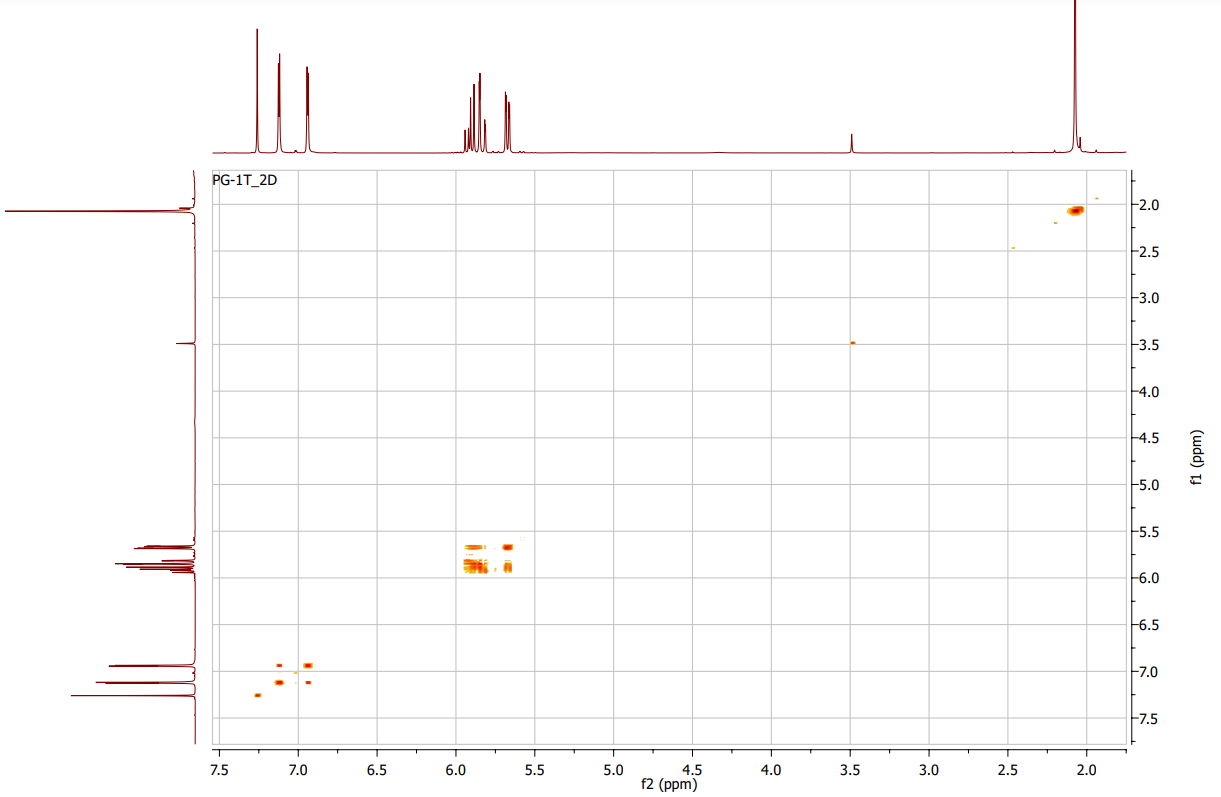


**Fig. S3**. 1H-1H COSY spectrum of compound **1**.


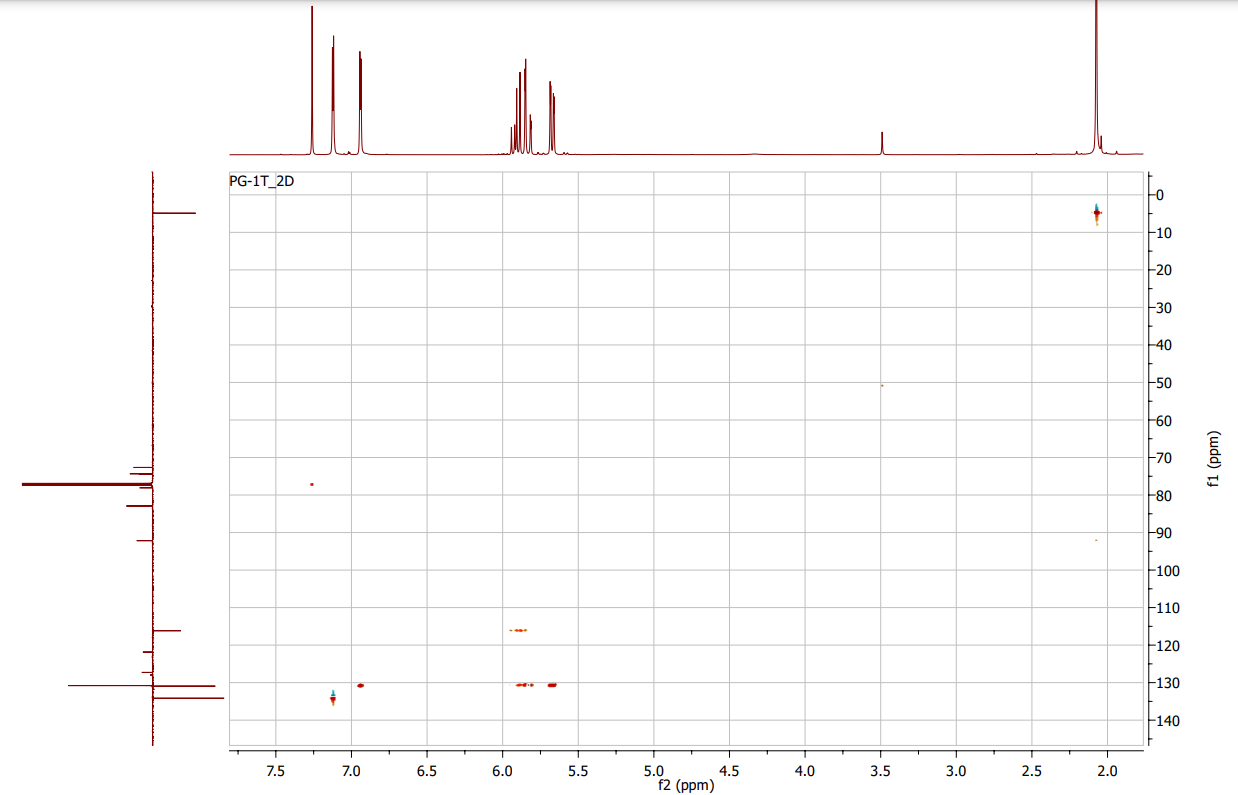


**Fig. S4**. HSQC spectrum of compound **1**.


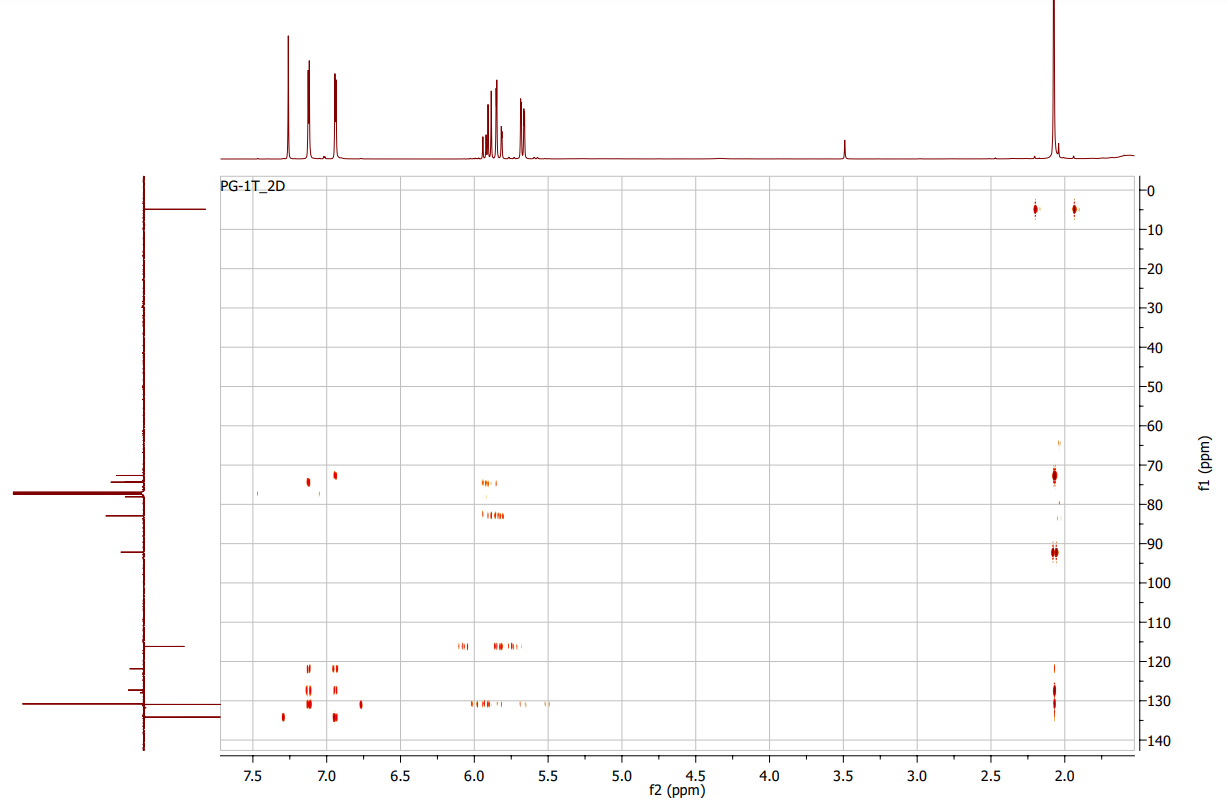


**Fig. S5**. HMBC spectrum of compound **1**.


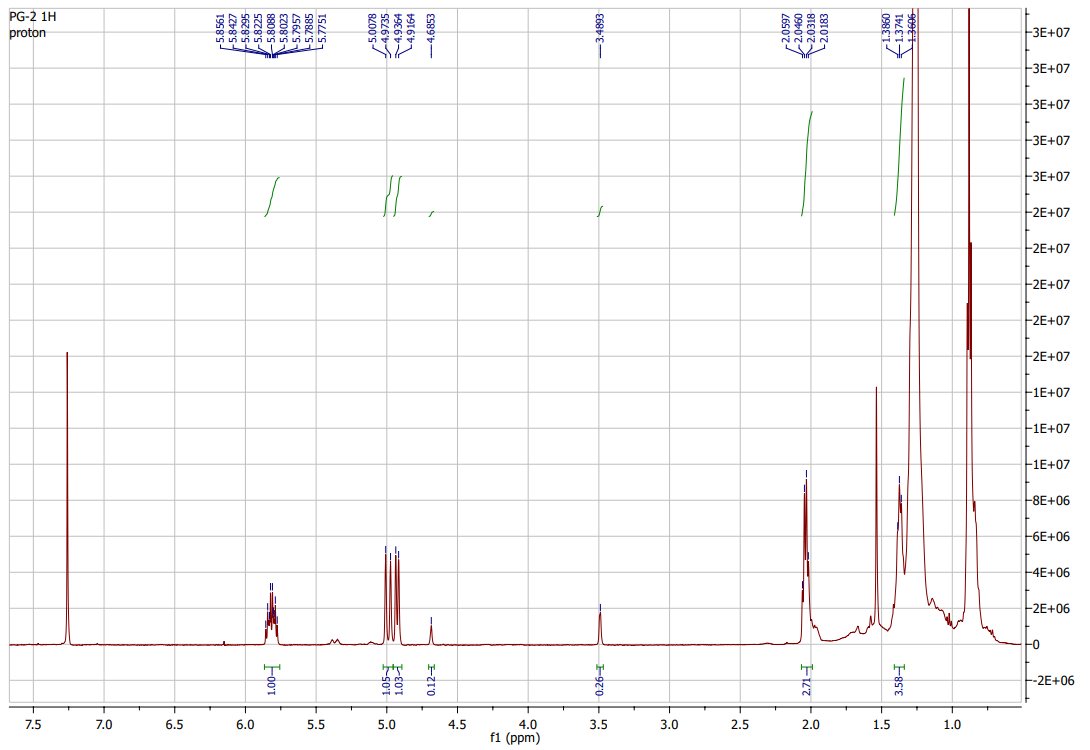


**Fig. S6**. 1H NMR spectrum of compound **2**.

**Fig. S7**. 1H NMR spectrum of compound **3**.


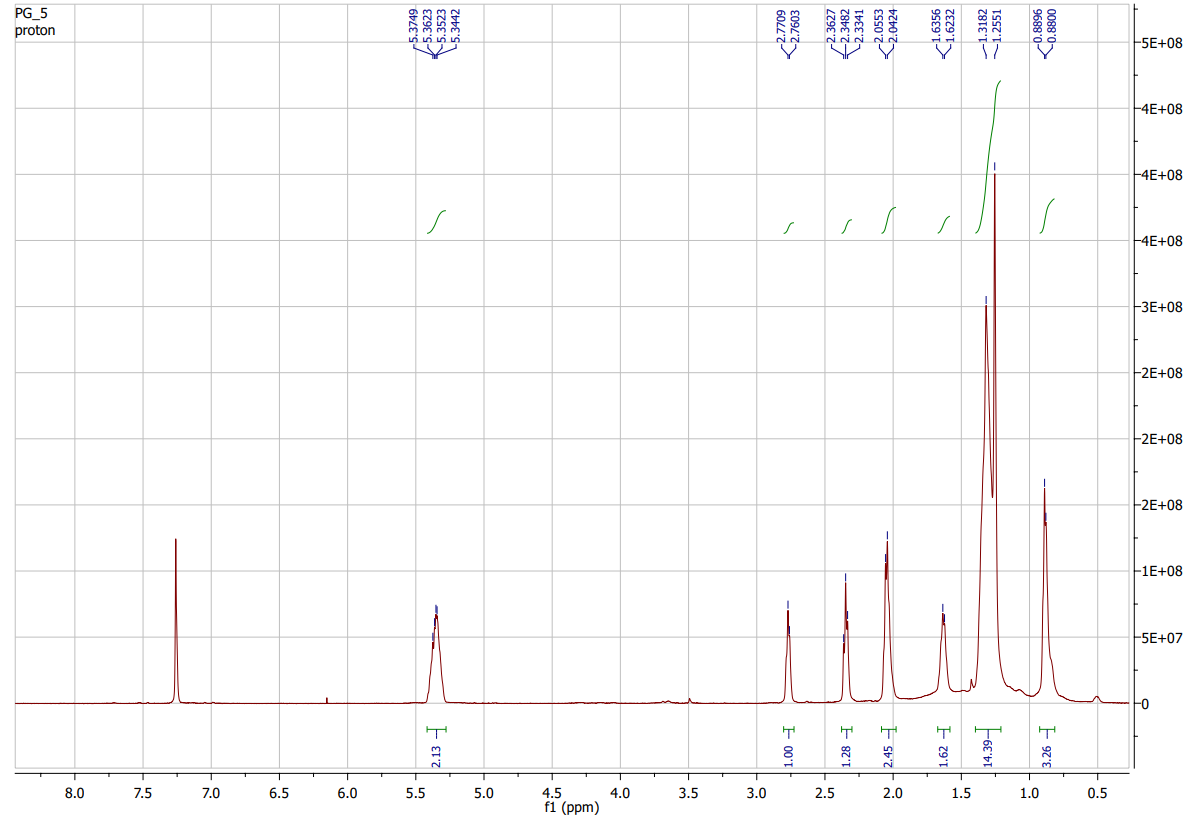


**Fig. S8**. 1H NMR spectrum of compound **4.**

**Fig. S9**. 1H NMR spectrum of compound **5**.

**Fig. S10**. 13C JMOD spectrum of compound **5**.

**Fig. S11**. 1H-1H COSY spectrum of compound **5**.

**Fig. S12**. HSQC spectrum of compound **5**.

**Fig. S13**. HMBC spectrum of compound **5**.

**Fig. S14**. NOESY spectrum of compound **5**.

**Fig. S15**. 1H NMR spectrum of compound **6**.

**Fig. S16**. 13C JMOD spectrum of compound **6**.


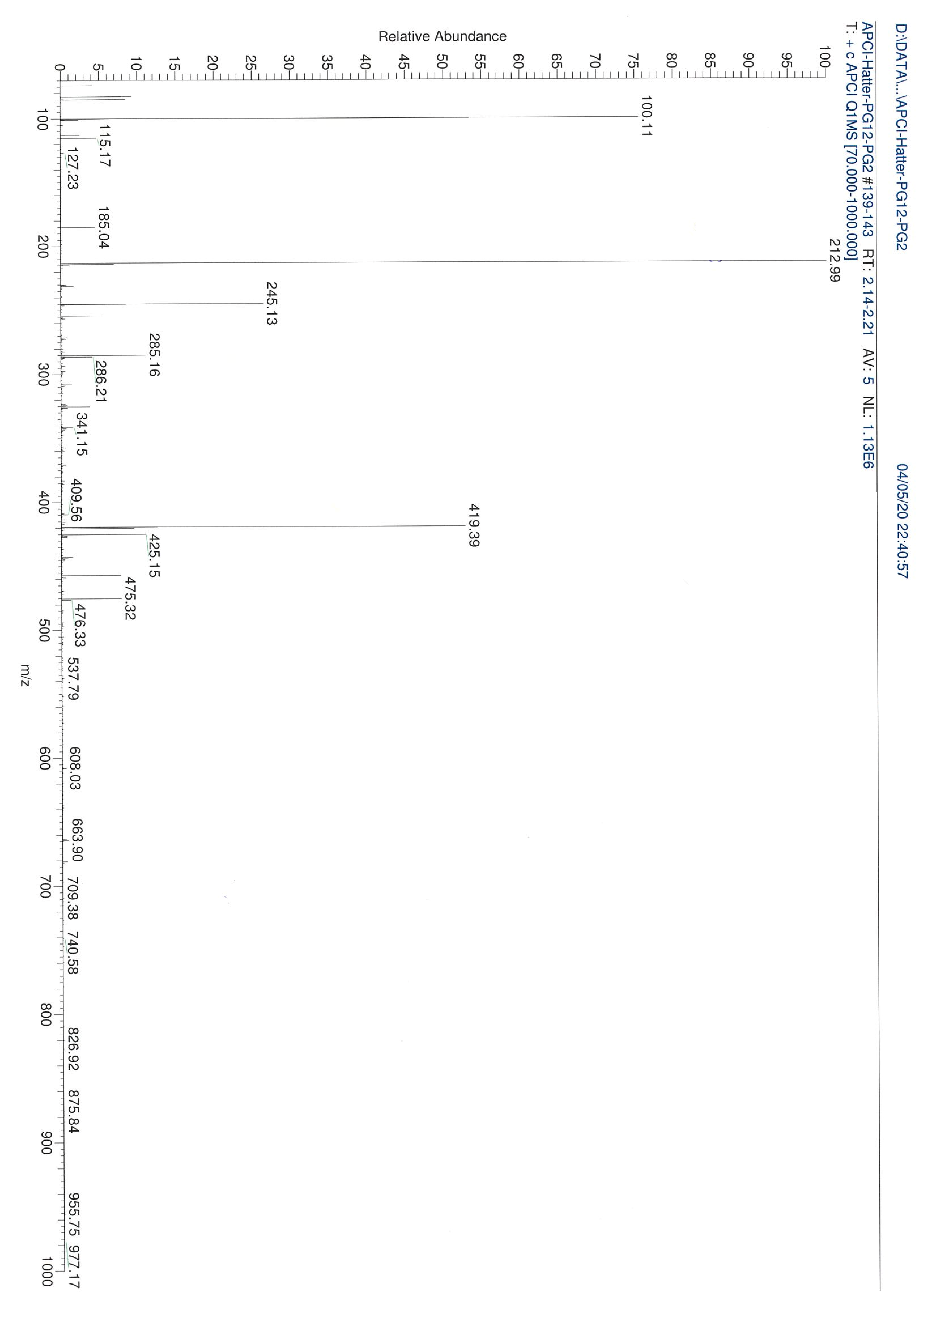


**Fig. S17**. Mass spectrum (APCI) of compound **6.**

**
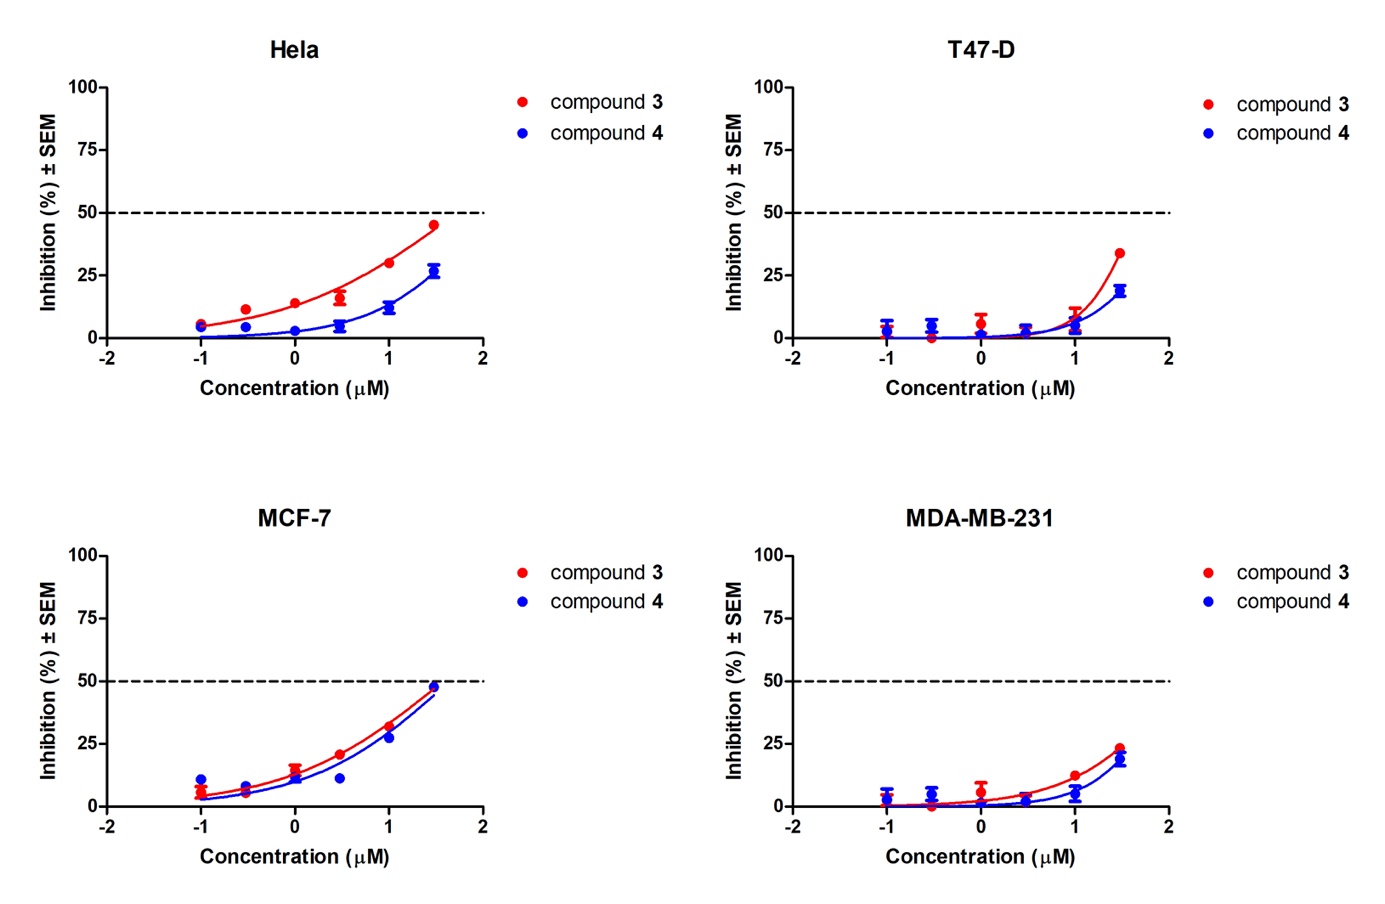
**

**Fig. S18.** Dose-effect curves of antiproliferative effects of compounds **3** and **4.**
